# Supplementary material for: Lignosulfonate as a versatile regulator for the mediated synthesis of Ag@AgCl nanocubes
Source: Royal Society of Chemistry journal article supplement (doi:10.1039/d4nr04161e), 2024-12-18
Supplement: d4nr04161e1.pdf [file d4nr04161e1.pdf]

## ***Supporting Information***

### **Lignosulfonate as a versatile regulator for the mediated synthesis of**

### **Ag@AgCl nanocubes**

Lingyu Yin<sup>a,1</sup>, Jian Yang<sup>a,1</sup>, Liqin Liu<sup>a,\*</sup>, Bin Lu<sup>b</sup>, Xiaofeng Lyu<sup>b</sup>, Zhengbai Cheng<sup>b</sup>, Hongbin Liu<sup>a,\*</sup>, Xingye An<sup>a,\*</sup>

<sup>a</sup> State Key Laboratory of Biobased Fiber Manufacturing Technology, Tianjin Key Laboratory of Pulp and Paper, China Light Industry Key Laboratory of Papermaking and Biorefinery, Tianjin University of Science and Technology, No. 29, 13th Street, TEDA, Tianjin 300457, P. R. China

<sup>b</sup> Zhejiang Jing Xing Paper Co., Ltd., No. 1, Jingxing Industry Zone, Jingxing First Road, Caoqiao Street, Pinghu, Zhejiang Province, 314214, P. R. China

<sup>1</sup>These authors contributed equally to this work.

\*Corresponding Authors:

*E-mail address:* anxingye@tust.edu.cn (X.Y. An), liuliqin@tust.edu.cn (L.Q. Liu), hongbin@tust.edu.cn (H.B. Liu)

# S1 Influences of LS concentration on the morphology of Ag@AgCl nanocubes

**Table S1.** Dosages of LS, NaCl and AgNO<sub>3</sub>

| Sample No  | LS (mM) | NaCl (mM) | AgNO <sub>3</sub> (mM) |
|------------|---------|-----------|------------------------|
| Ag@AgCl-1  | 0       | 10        | 10                     |
| Ag@AgCl-2  | 0.025   | 10        | 10                     |
| Ag@AgCl-3  | 0.125   | 10        | 10                     |
| Ag@AgCl-4  | 0.25    | 10        | 10                     |
| Ag@AgCl-5  | 0.5     | 10        | 10                     |
| Ag@AgCl-6  | 1.0     | 10        | 10                     |
| Ag@AgCl-7  | 1.5     | 10        | 10                     |
| Ag@AgCl-8  | 2.0     | 10        | 10                     |
| Ag@AgCl-9  | 3.0     | 10        | 10                     |
| Ag@AgCl-10 | 4.0     | 10        | 10                     |
| Ag@AgCl-11 | 5.0     | 10        | 10                     |

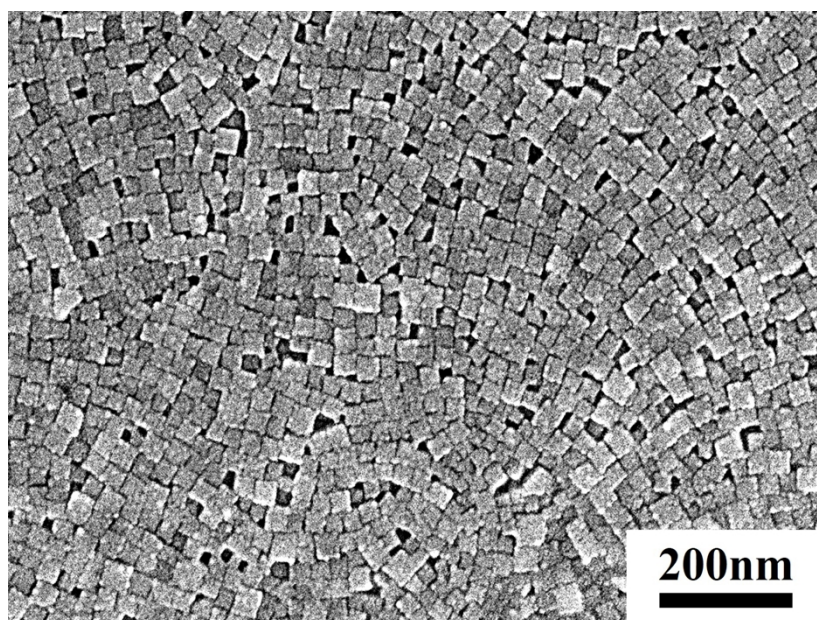

**Figure S1.** FESEM images of Ag@AgCl nanocubes after one week of placement at a regulated concentration of 1.0mM.

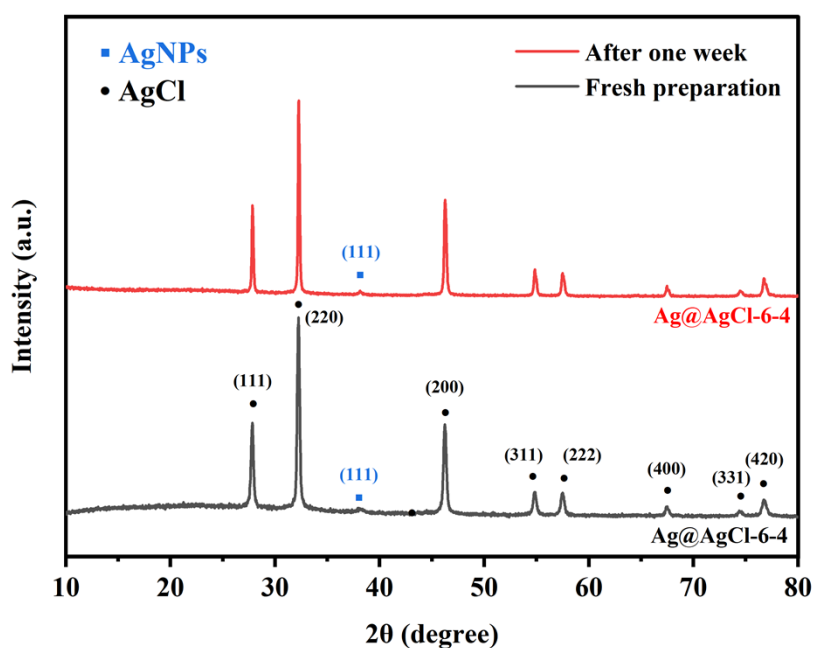

**Figure S2.** XRD pattern of Ag@AgCl nanocubes after preserving for one week.

## S2 Influence of reaction time on the morphology of Ag@AgCl nanocubes

**Table S2.** Different reaction times in the synthesis of Ag@AgCl nanocubes

| Sample No   | Time (min) | LS concentration (mM) |
|-------------|------------|-----------------------|
| Ag@AgCl-6-1 | 1          | 1.0                   |
| Ag@AgCl-6-2 | 10         | 1.0                   |
| Ag@AgCl-6-3 | 30         | 1.0                   |
| Ag@AgCl-6-4 | 60         | 1.0                   |
| Ag@AgCl-6-5 | 600        | 1.0                   |
| Ag@AgCl-6-6 | 900        | 1.0                   |
| Ag@AgCl-6-7 | 1200       | 1.0                   |
| Ag@AgCl-6-8 | 1800       | 1.0                   |

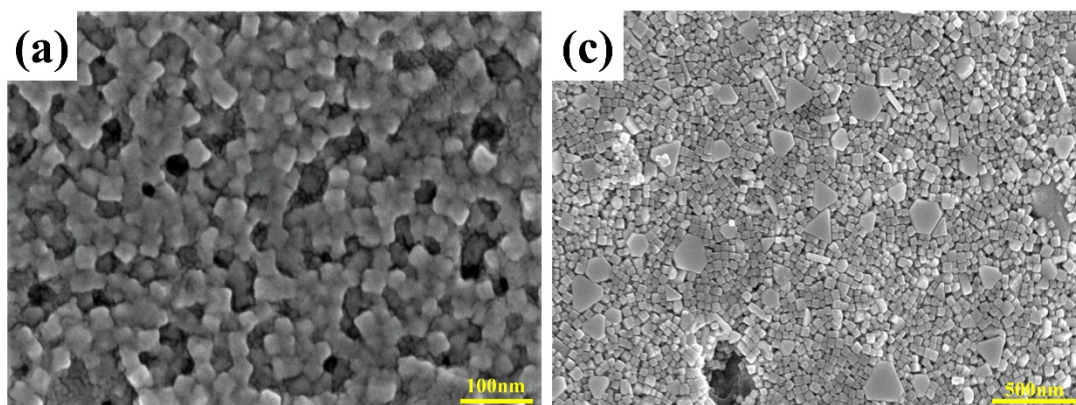

**Figure S3.** FESEM images of Ag@AgCl nanocubes after (a) 10 h and (b) 20 h reaction time, respectively.

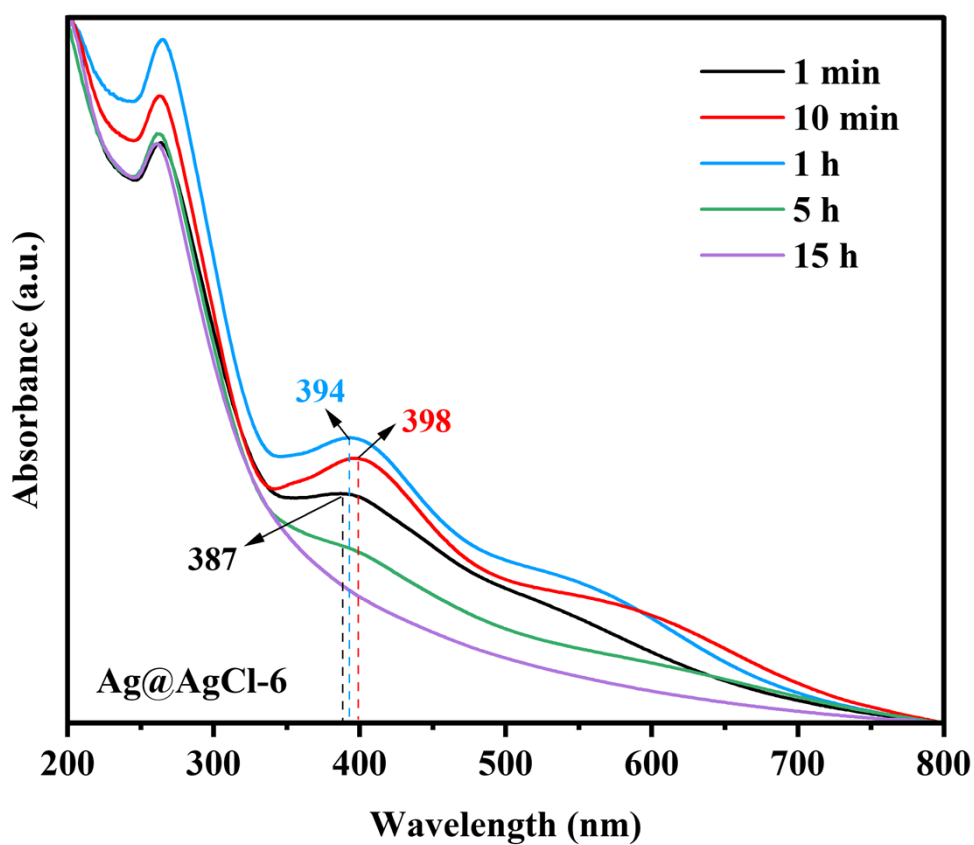

**Figure S4.** UV-vis spectra of Ag@AgCl-6 nanocubes at different reaction times.

### S3 FTIR analysis

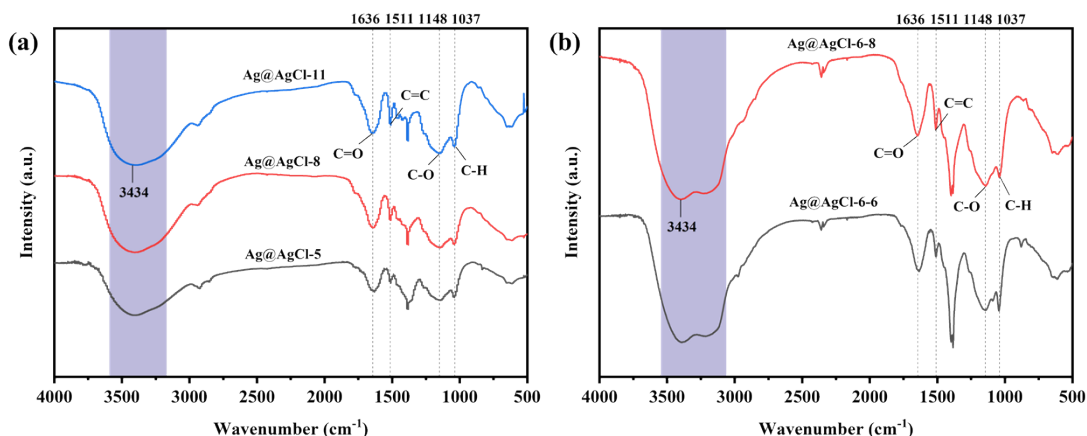

**Figure S5.** FTIR spectra of Ag@AgCl nanocomposites regulated by (a) different reaction times and (b) LS concentrations.

#### S4 XPS analysis of Ag@AgCl nanocubes

**Table S3.** Relative contents of Ag elements in Ag3d XPS spectrum

| Sample No     | Ag <sup>0</sup> : Ag <sup>+</sup> |
|---------------|-----------------------------------|
| Ag@AgCl-1-4   | 0:1.0                             |
| Ag@AgCl@-6-4  | 0.39:1.0                          |
| Ag@AgCl@-11-4 | 2.83:1.0                          |

**Table S4.** Relative contents of C element in C1s XPS spectrum

| Sample No     | C=O:C=C  |
|---------------|----------|
| Ag@AgCl-1-4   | 0.2:1.0  |
| Ag@AgCl-6-4   | 0.6:1.0  |
| Ag@AgCl@-11-4 | 0.52:1.0 |

**Table S5.** Relative contents of O elements in O1s XPS spectrum

| Sample No    | C-O:C=O:SO <sub>3</sub> <sup>-</sup> |
|--------------|--------------------------------------|
| Ag@AgCl-1-4  | 0.49:1.0:0                           |
| Ag@AgCl-6-4  | 0.40:1.0:0.65                        |
| Ag@AgCl-11-4 | 0.04:1.0:0.24                        |

**Table S6.** Relative contents of Cl elements in Cl2p XPS spectrum

| Sample No    | Cl2p <sub>1/2</sub> : Cl2p <sub>3/2</sub> |
|--------------|-------------------------------------------|
| Ag@AgCl-1-4  | 0.75:1.0                                  |
| Ag@AgCl-6-4  | 0.49:1.0                                  |
| Ag@AgCl-11-4 | 0.48:1.0                                  |

Overall, the zeta potential showed a gradual upward trend over time, increasing from -20.77 mV to -16.36 mV (Figure S6.). This suggests that the electrostatic repulsion between the composites weakens over time, probably due to the saturation of LS adsorption, leading to a decrease in dispersion stability. However, the Zeta potential was roughly maintained between -16 mV and -20 mV, reflecting the dynamic balance between the dispersion and aggregation of silver nanoparticles in the solution during the whole observation period, and the stability of the suspension was good.

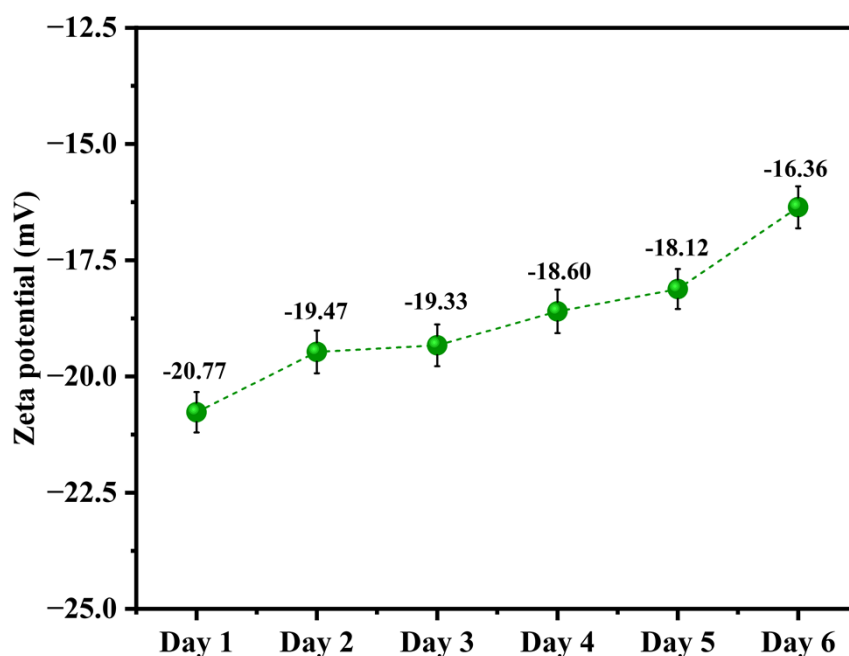**Figure S6.** Zeta potential map of Ag@AgCl nanocubes at different reaction times.**Table S7.** The yield of the Ag@AgCl nanocube and the proportion of silver

nanoparticles deposited on the surface

|                                                                                     | Ag@AgCl-6-4 |
|-------------------------------------------------------------------------------------|-------------|
| Ag <sup>0</sup> : Ag <sup>+</sup>                                                   | 0.39:1.0    |
| the yield of the Ag@AgCl nanocube                                                   | 84.37 %     |
| the proportion of silver nanoparticles deposited on<br>the Ag@AgCl nanocube surface | 28.06 %     |
